# Supplementary material for: Synthesis of Polyfunctionalized 4H‐Pyrans
Source: Hindawi journal article supplement (doi:10.1155/2013/785930), 2012-12-09

## Supplementary Materials

### Synthesis of polyfunctionalized 4*H*-pyrans

Manisha Bihani, Pranjal P Bora and Ghanashyam Bez\*

*Department of Chemistry, North Eastern Hill University, Shillong-793022, India*

[bez@nehu.ac.in](mailto:bez@nehu.ac.in); [ghanashyambez@yahoo.com](mailto:ghanashyambez@yahoo.com)

#### CONTENT

|                                                                     |                    |
|---------------------------------------------------------------------|--------------------|
| <b>General remarks</b>                                              | <b>page S1</b>     |
| <b><sup>1</sup>H and <sup>13</sup>CNMR spectra of new compounds</b> | <b>page S2-S15</b> |

#### General remarks

IR spectra were recorded on a Perkin–Elmer Spectrum One FTIR spectrometer. <sup>1</sup>H and <sup>13</sup>C NMR spectra were recorded on a Bruker (300 MHz and 400 MHz) spectrometer using TMS as internal reference. Chemical shifts for <sup>1</sup>H NMR spectra are reported with CDCl<sub>3</sub> and (CD<sub>3</sub>)<sub>2</sub>SO as solvents. <sup>13</sup>C NMR spectra were recorded at 100 MHz. Chemical shifts for <sup>13</sup>C NMR spectra are reported with CDCl<sub>3</sub> and (CD<sub>3</sub>)<sub>2</sub>SO as solvents. Mass spectra were obtained from Waters ZQ 4000 mass spectrometer by the ESI method, while the elemental analyses of the complexes were performed on a Perkin–Elmer-2400 CHN/S analyzer. TLC plates were visualized by exposing in iodine chamber, UV-lamp or spraying with KMnO<sub>4</sub> and heating.

<sup>1</sup>H, M-147, DMSOd6, 07/06/12 SAIF, NEHU, DRD

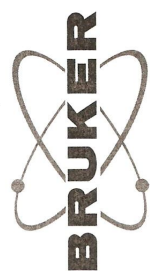

Current Data Parameters  
NAME M-147  
EXPNO 1  
PROCNO 1

F2 - Acquisition Parameters  
Date\_ 20120607  
Time\_ 12.15  
INSTRUM spect  
PROBHD 5 mm BBO BB-1H  
PULPROG zg  
TD 32768  
SOLVENT DMSO  
NS 8  
DS 0  
SWH 12019.230 Hz  
FIDRES 0.366798 Hz  
AQ 1.3631988 sec  
RG 12.7  
DW 41.600 use  
DE 6.00 use  
TE 300.0 K  
D1 1.00000000 sec  
TD0 1

===== CHANNEL f1 =====  
NUC1 <sup>1</sup>H  
P1 14.00 use  
PL1 -1.00 dB  
SFO1 400.1316005 MHz

F2 - Processing parameters  
SI 16384  
SF 400.1300824 MHz  
WDW EM  
SSB 0  
LB 1.00 Hz  
GB 0  
PC 1.00

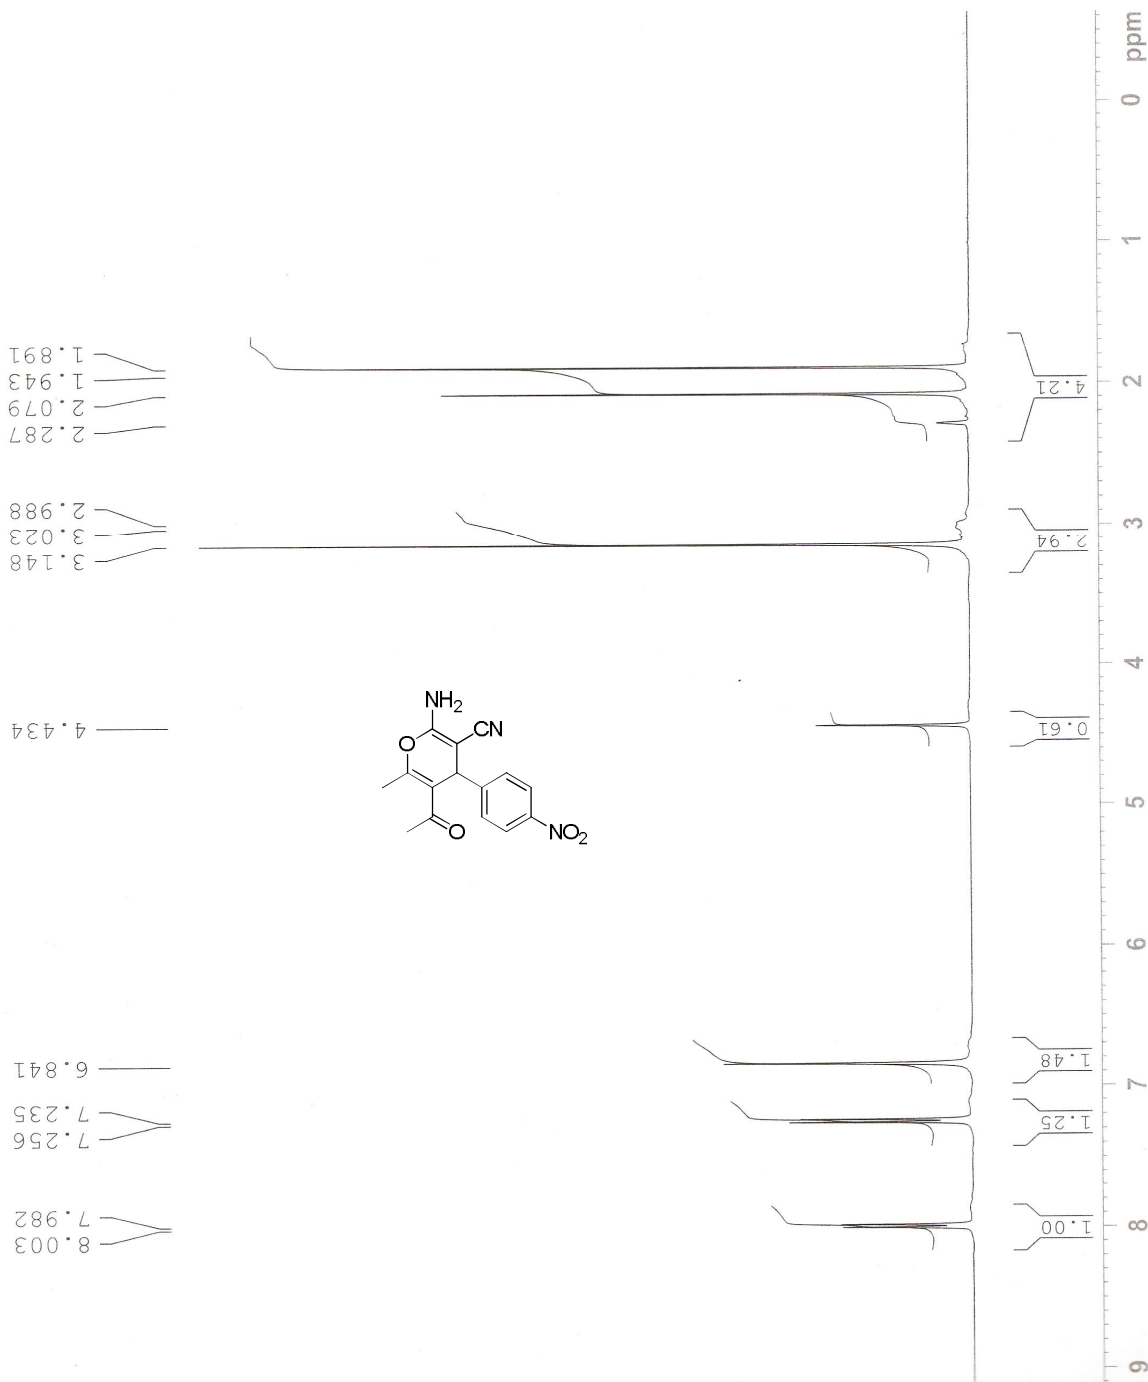

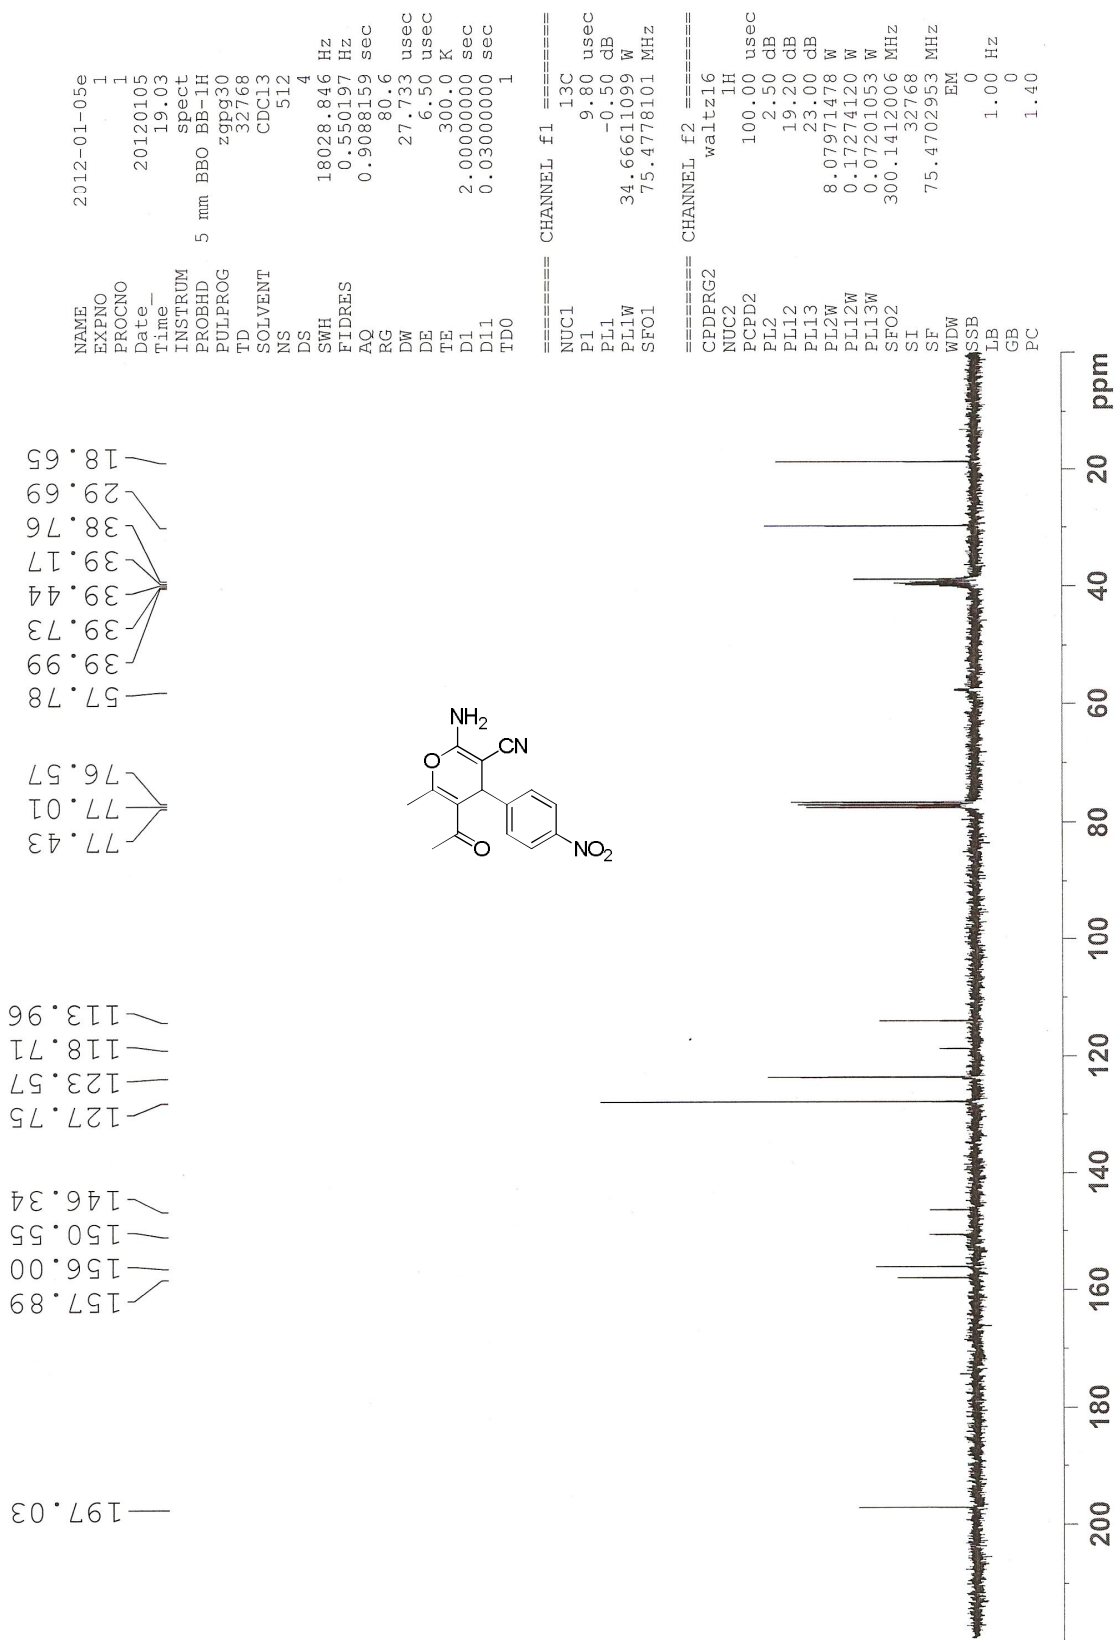

<sup>1</sup>H M-150, DMSO-d<sub>6</sub>, 22/06/12, SAIF, NEHU, DRW

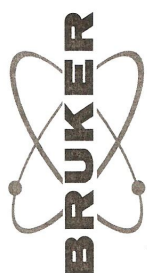

Current Data Parameters  
NAME M-150  
EXPNO 1  
PROCNO 1

F2 - Acquisition Parameters  
Date\_ 20120622  
Time 11.59  
INSTRUM spect  
PROBHD 5 mm BBO BB-1H  
PULPROG zg  
TD 32768  
SOLVENT DMSO  
NS 8  
DS 0  
SWH 12019.230 Hz  
FIDRES 0.366798 Hz  
AQ 1.3631988 sec  
RG 12.7  
DW 41.600 usec  
DE 6.00 usec  
TE 300.0 K  
D1 1.00000000 sec  
TD0 1

===== CHANNEL f1 =====  
NUC1 <sup>1</sup>H  
P1 14.00 usec  
PL1 -1.00 dB  
SFO1 400.1316005 MHz

F2 - Processing parameters  
SI 16384  
SF 400.1300947 MHz  
WDW EM  
SSB 0  
LB 1.00 Hz  
GB 0  
PC 1.00

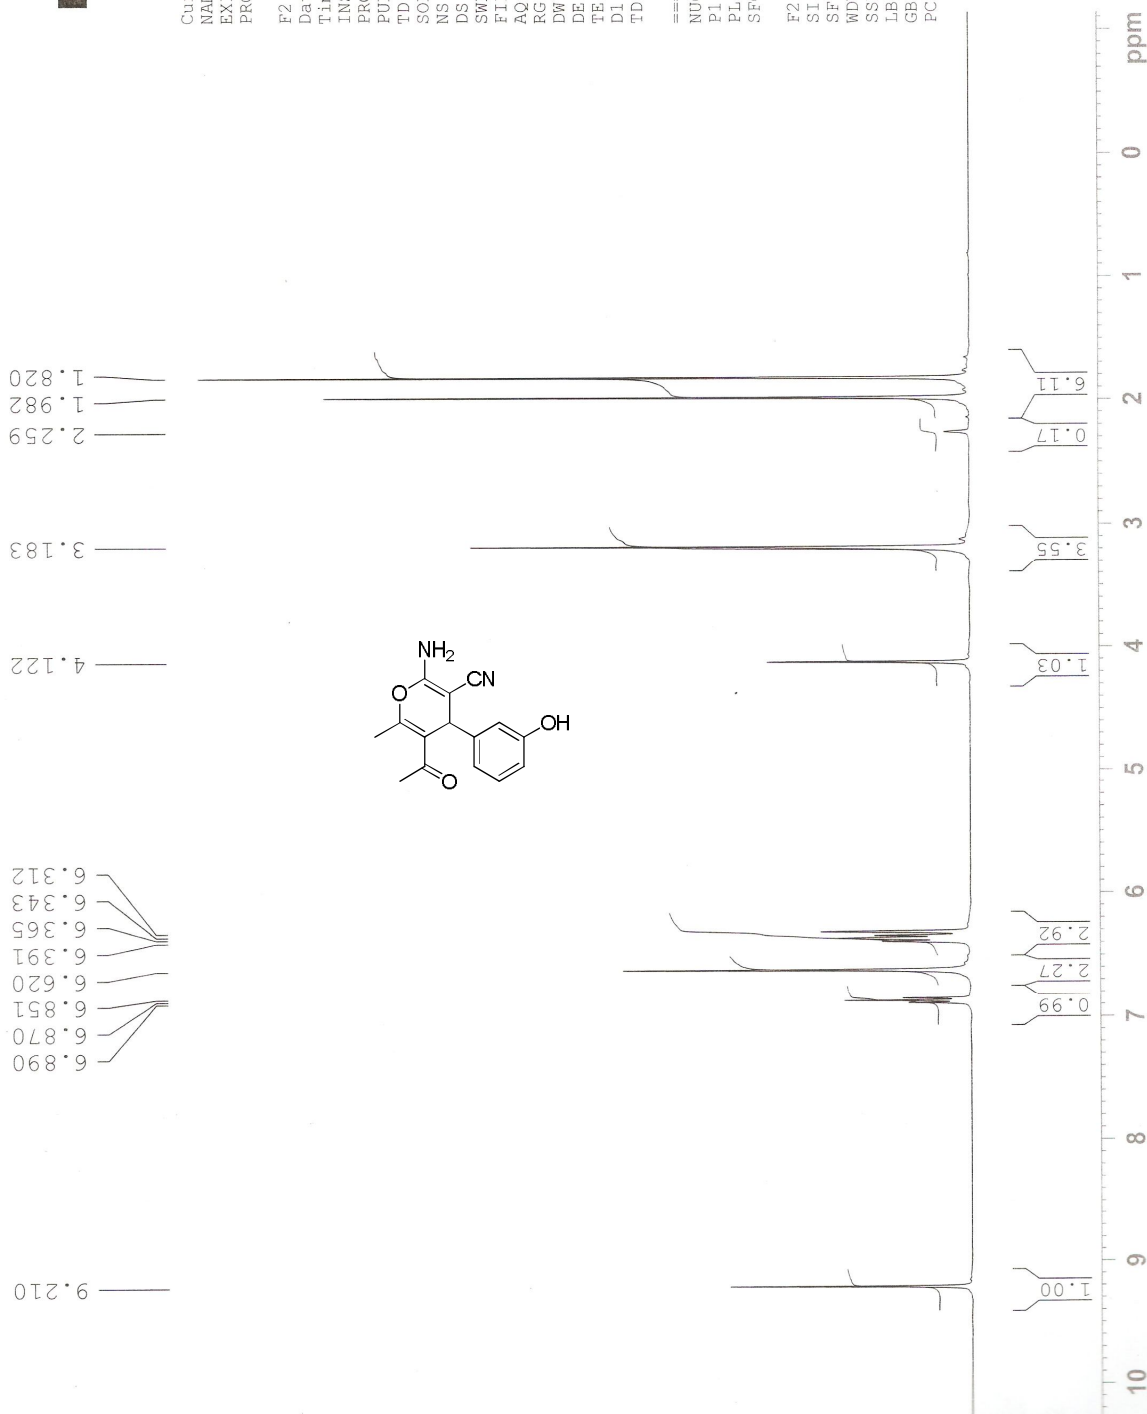

13C M-150, DMSOd6, 22/06/12, DRW, SAI7, NEHU

198.464  
158.203  
157.592  
154.542  
145.955  
129.675  
119.850  
117.724  
114.922  
114.001  
113.864  
57.706  
39.992  
39.783  
39.574  
39.365  
39.156  
38.948  
38.736  
38.632  
29.683  
18.352

114.001  
113.864

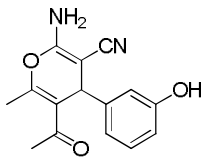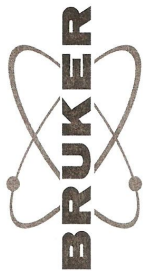

Current Data Parameters  
NAME 13C M-150  
EXPNO 1  
PROCNO 1

F2 - Acquisition Parameters  
Date\_ 20120622  
Time 12.47  
INSTRUM spect  
PROBHD 5 mm BBO BB-1H  
PULPROG zgpg  
TD 262144  
SOLVENT DMSO  
NS 525  
DS 0  
SWH 40760.871 Hz  
FIDRES 0.155490 Hz  
AQ 3.2156830 sec  
RG 161  
DW 12.267 usec  
DE 6.00 usec  
TE 300.0 K  
D1 2.00000000 sec  
d11 0.03000000 sec  
DELTA 1.89999998 sec  
TD0 1

===== CHANNEL f1 =====  
NUC1 13C  
P1 8.50 usec  
PL1 -2.00 dB  
SFO1 100.6208180 MHz

===== CHANNEL f2 =====  
CPDPRG2 waltz16  
NUC2 1H  
PCPD2 80.00 usec  
PL12 14.00 dB  
PL13 18.00 dB  
PL2 -1.00 dB  
SFO2 400.1320007 MHz

F2 - Processing parameters  
SI 131072  
SF 100.6128193 MHz  
EM  
WDW 0  
SSB 0  
LB 0.30 Hz  
GB 0  
PC 1.40

ppm

1H Z-163, DMSOd6, 21/06/12, SALT, NEHU, DRW

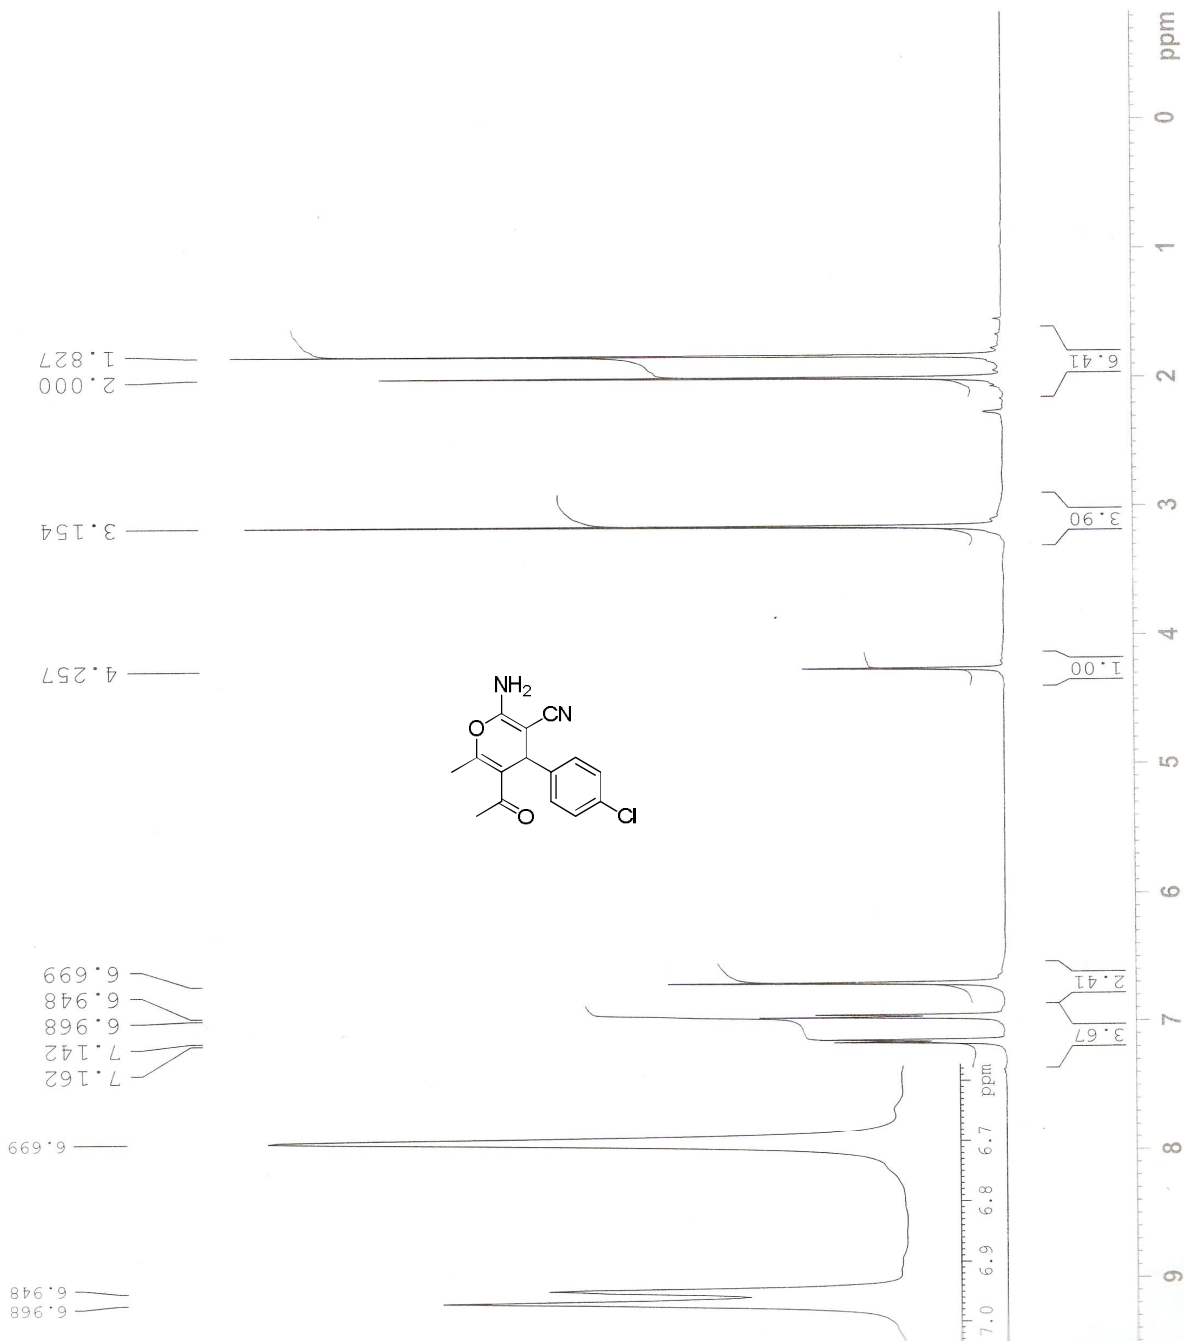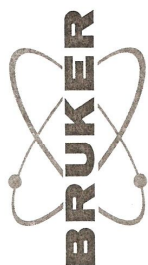

Current Data Parameters  
NAME Z-163  
EXPNO 1  
PROCNO 1

F2 - Acquisition Parameters  
Date\_ 20120621  
Time\_ 11.19  
INSTRUM spect  
PROBHD 5 mm BBO BB-1H  
PULPROG zg  
TD 32768  
SOLVENT DMSO  
NS 8  
DS 0  
SWH 12019.230 Hz  
FIDRES 0.366798 Hz  
AQ 1.3631988 sec  
RG 101  
DW 41.600 usec  
DE 6.00 usec  
TE 300.0 K  
D1 1.00000000 sec  
TD0 1

==== CHANNEL f1 =====  
NUC1 1H  
P1 14.00 usec  
PL1 -1.00 dB  
SFO1 400.1316005 MHz  
F2 - Processing parameters  
SI 16384  
SF 400.1300930 MHz  
WDW EM  
SSB 0  
LB 1.00 Hz  
GB 0  
PC 1.00

<sup>13</sup>C M-149, DMSO-d<sub>6</sub>, 22/06/12, DRW, SAIF, NEHU

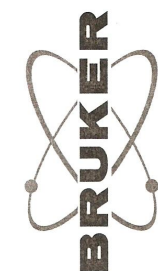

Current Data Parameters  
NAME 13C M-149  
EXPNO 1  
PROCNO 1

F2 - Acquisition Parameters  
Date\_ 20120622  
Time\_ 13.29  
INSTRUM spect  
PROBHD 5 mm BBO BB-1H  
PULPROG zgpg  
TD 262144  
SOLVENT DMSO  
NS 437  
DS 0  
SWH 40760.871 Hz  
FIDRES 0.155490 Hz  
AQ 3.2156830 sec  
RG 161  
DW 12.267 usec  
DE 6.00 usec  
TE 300.0 K  
D1 2.00000000 sec  
d11 0.03000000 sec  
DELTA 1.89999998 sec  
TD0 1

===== CHANNEL f1 =====  
NUC1 <sup>13</sup>C  
P1 8.50 usec  
PL1 -2.00 dB  
SFO1 100.6208180 MHz

===== CHANNEL f2 =====  
CPDPRG2 waltz16  
NUC2 <sup>1</sup>H  
PCPD2 80.00 usec  
PL12 14.00 dB  
PL13 18.00 dB  
PL2 -1.00 dB  
SFO2 400.1320007 MHz

F2 - Processing parameters  
SI 131072  
SF 100.6128193 MHz  
WDW EM  
SSB 0  
LB 0.30 Hz  
GB 0  
PC 1.40

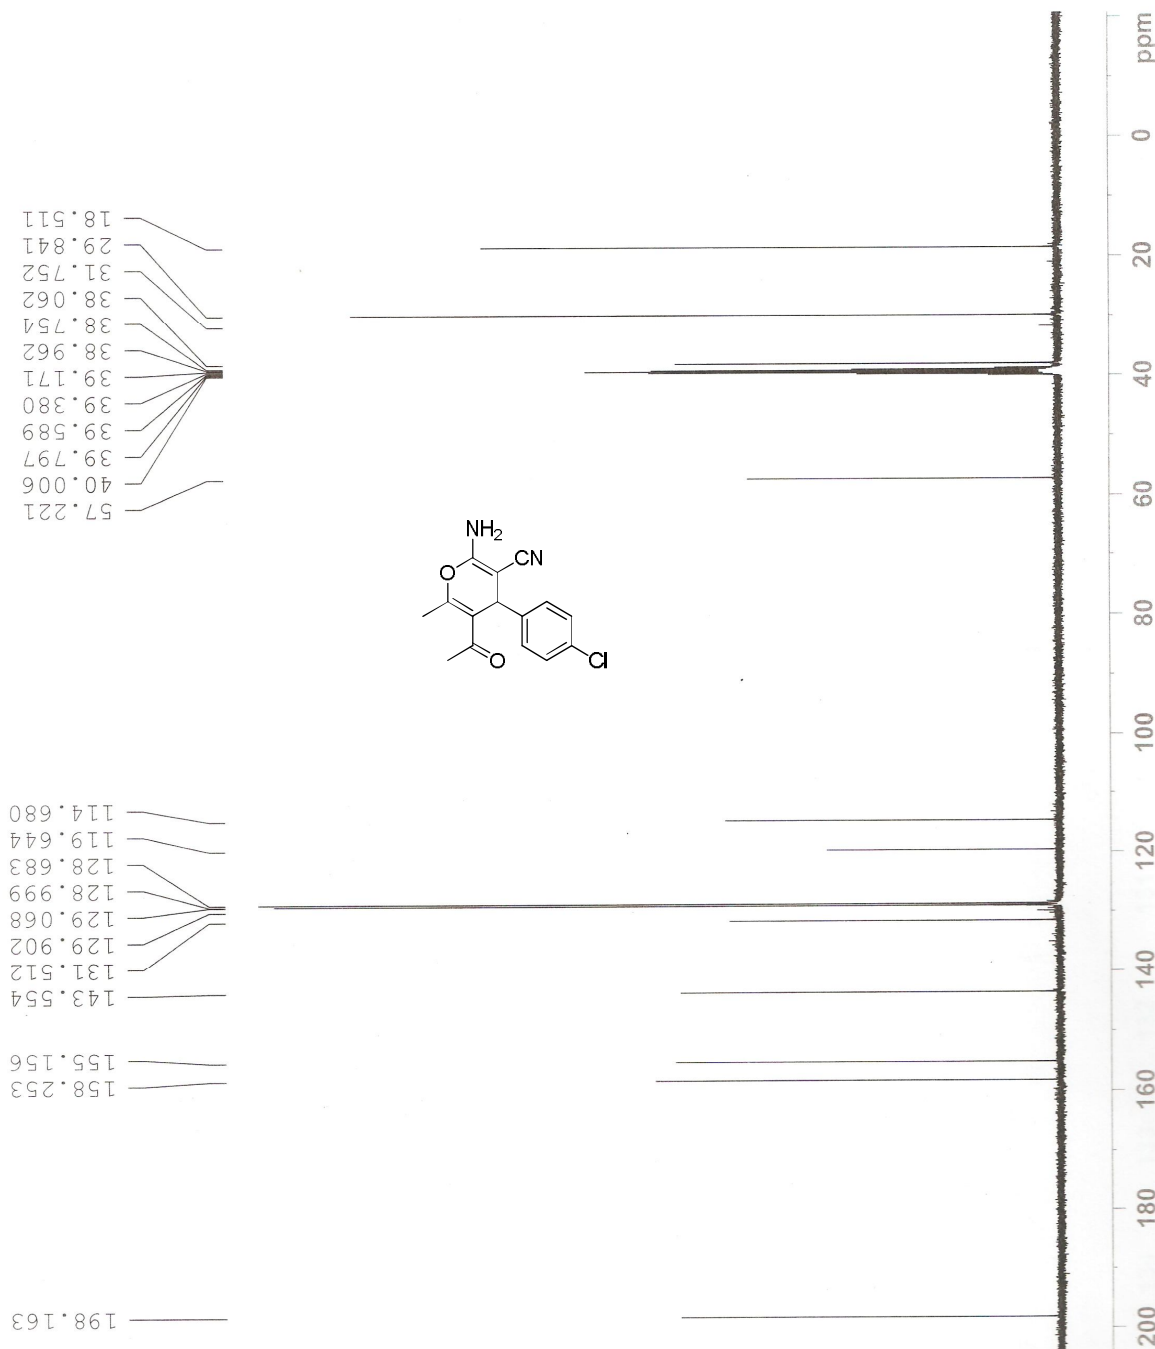

1H PGB-3, DMSOd6, 02/12/11, SAIF, NEHU, DRW

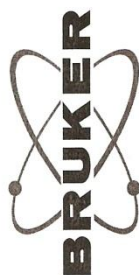

Current Data Parameters  
NAME PGB-3  
EXPNO 1  
PROCNO 1

F2 - Acquisition Parameters  
Date\_ 20111202  
Time\_ 14.21  
INSTRUM spect  
PROBHD 5 mm BBO BB-1H  
PULPROG zg  
TD 32768  
SOLVENT DMSO  
NS 8  
DS 0  
SWH 12019.230 Hz  
FIDRES 0.366798 Hz  
AQ 1.3631988 sec  
RG 64  
DW 41.600 usec  
DE 6.00 usec  
TE 300.0 K  
D1 1.00000000 sec  
TD0 1

===== CHANNEL f1 =====  
NUC1 1H  
PL 14.00 usec  
PL1 -1.00 dB  
SFO1 400.1316005 MHz

F2 - Processing parameters  
SI 16384  
SF 400.1300643 MHz  
WDW EM  
SSB 0  
LB 1.00 Hz  
GB 0  
PC 1.00

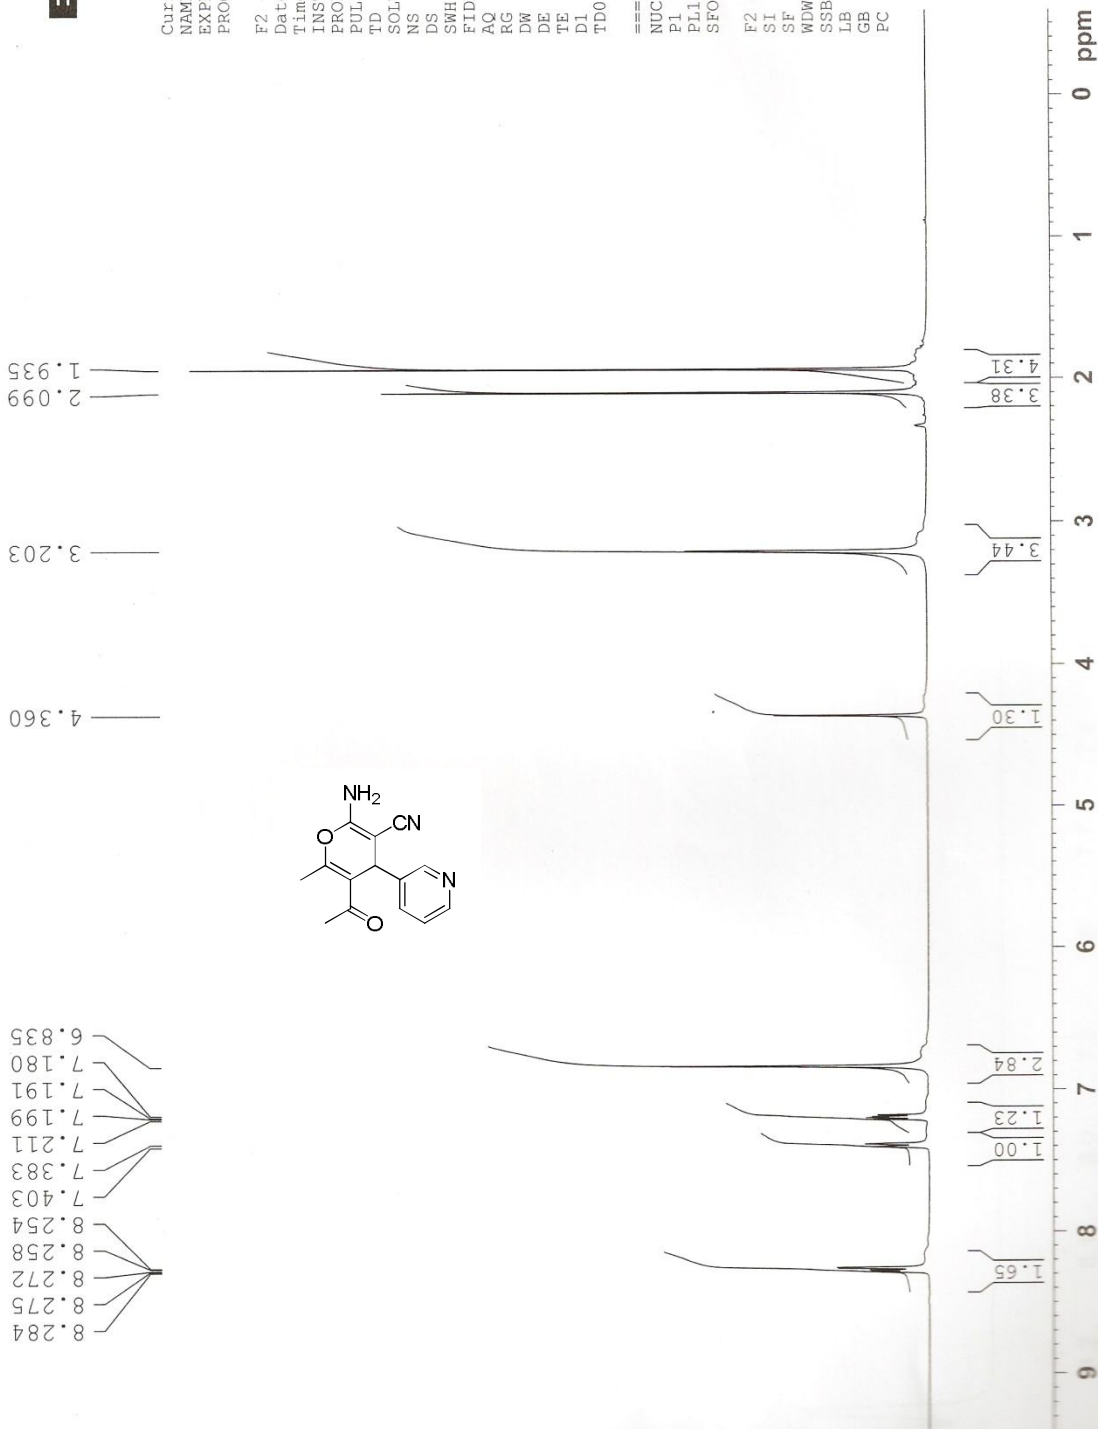



13C PGB-5, DMSOd6, 3/12/11, DRW, SAIF, NEHU

197.875

158.456  
155.860  
148.324  
148.138  
140.032  
134.828  
123.986  
119.559  
114.397

56.853  
40.032  
39.824  
39.614  
39.406  
39.197  
38.987  
38.778  
36.271  
30.027  
18.677

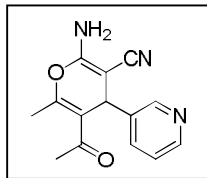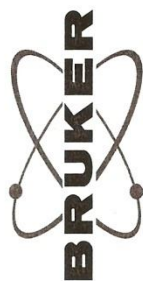

Current Data Parameters  
NAME 13C PGB-5  
EXPNO 1  
PROCNO 1

F2 - Acquisition Parameters  
Date\_ 20111203  
Time 12.42  
INSTRUM spect  
PROBHD 5 mm BBO BB-1H  
PULPROG zgpg  
TD 262144  
SOLVENT DMSO  
NS 837  
DS 0  
SWH 40760.871 Hz  
FIDRES 0.135490 Hz  
AQ 3.2156830 sec  
RG 256  
DE 12.267 usec  
TE 300.0 K  
D1 1.00000000 sec  
d11 0.03000000 sec  
DELTA 0.89999998 sec  
TD0 1

===== CHANNEL f1 =====  
NUC1 13C  
P1 8.50 usec  
PL1 -2.00 dB  
SFO1 100.6208180 MHz

===== CHANNEL f2 =====  
CPDPRG2 waltz16  
NUC2 1H  
PCPD2 80.00 usec  
PL12 14.00 dB  
PL13 18.00 dB  
PL2 -1.00 dB  
SFO2 400.1320007 MHz

F2 - Processing parameters  
SI 131072  
SF 100.6128193 MHz  
EM 0  
SSB 0  
LB 0.30 Hz  
GB 0  
PC 1.40

ppm

1H, M-108, DMSOd6, 10.01.2012, SAIF, NEHU, DRW

7.548  
7.543  
7.015  
6.361  
6.355  
6.353  
6.348  
6.140  
6.132  
4.616  
3.310  
2.498  
2.493  
2.489  
2.191  
2.183  
2.100

7.548  
7.543

7.015

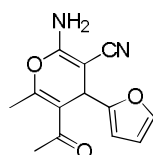

6.361  
6.355  
6.353  
6.348

6.140  
6.132

2.498  
2.493  
2.489

2.191  
2.183  
2.100

7.5 7.4 7.3 7.2 7.1 7.0 6.9 6.8 6.7 6.6 6.5 6.4 6.3 6.2 ppm

2.5 2.4 2.3 2.2 ppm

1.00

2.68

1.23

1.25

1.27

0.43

0.82

7.95

10 9 8 7 6 5 4 3 2 1 0 ppm

<sup>13</sup>C M-108, DMSO-d<sub>6</sub>, 10.01.2012, SAIF, NEHU, DRW

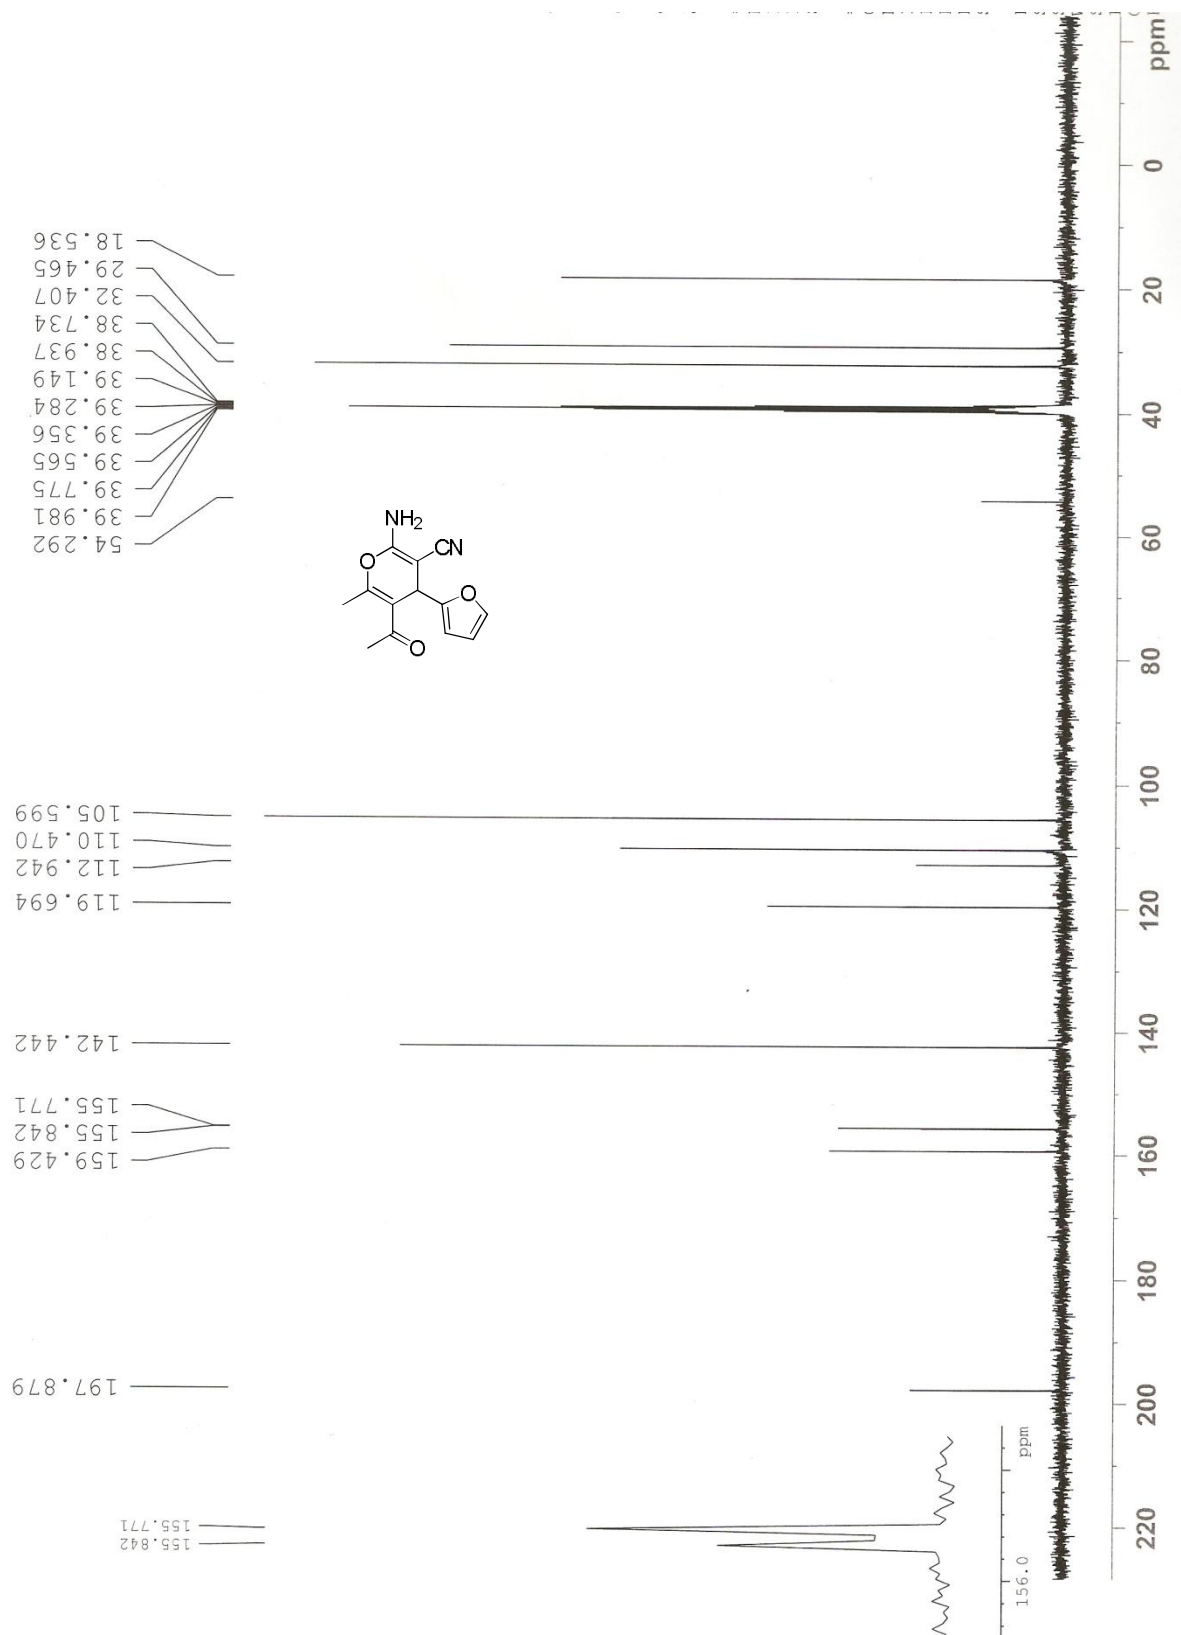

MET-

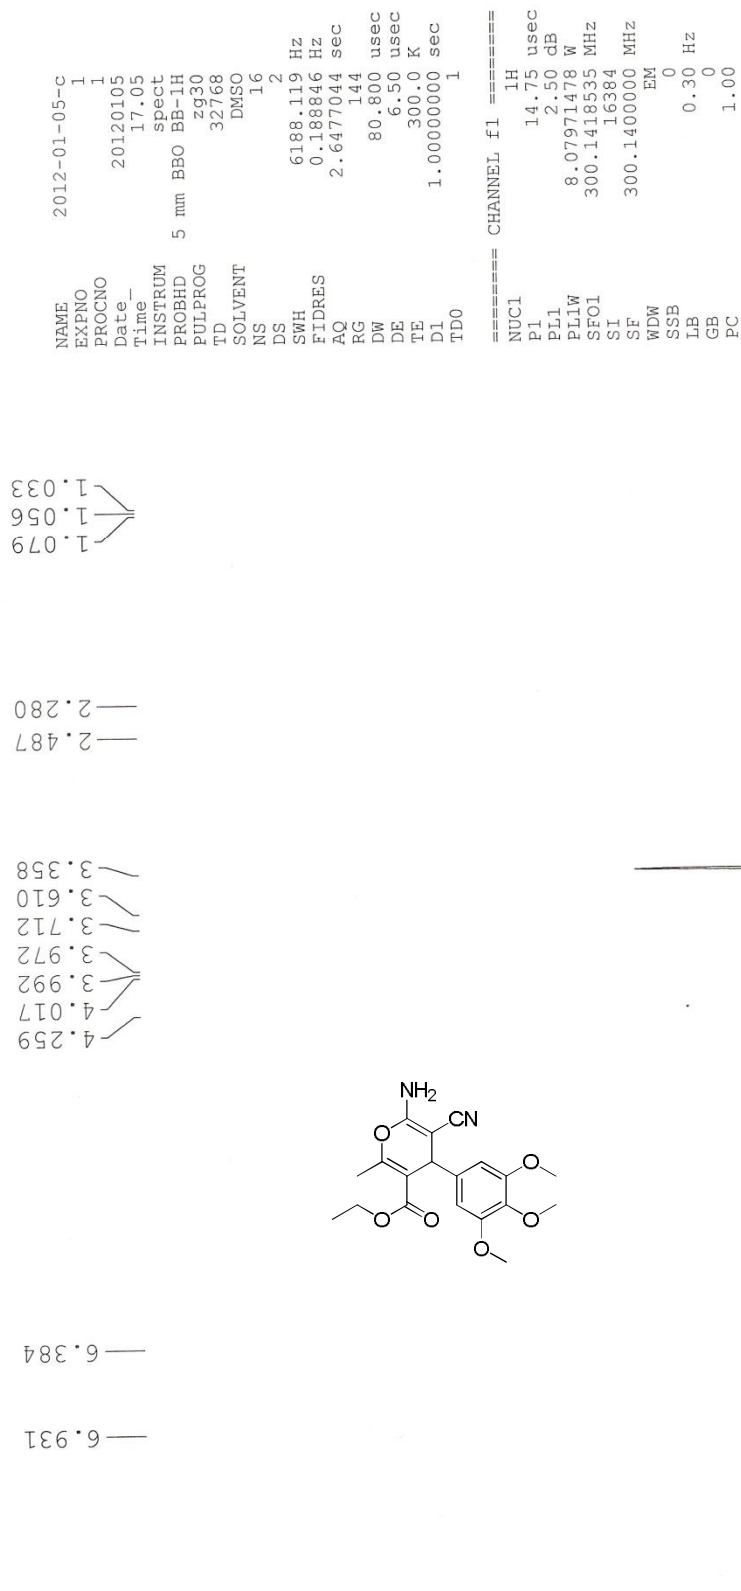

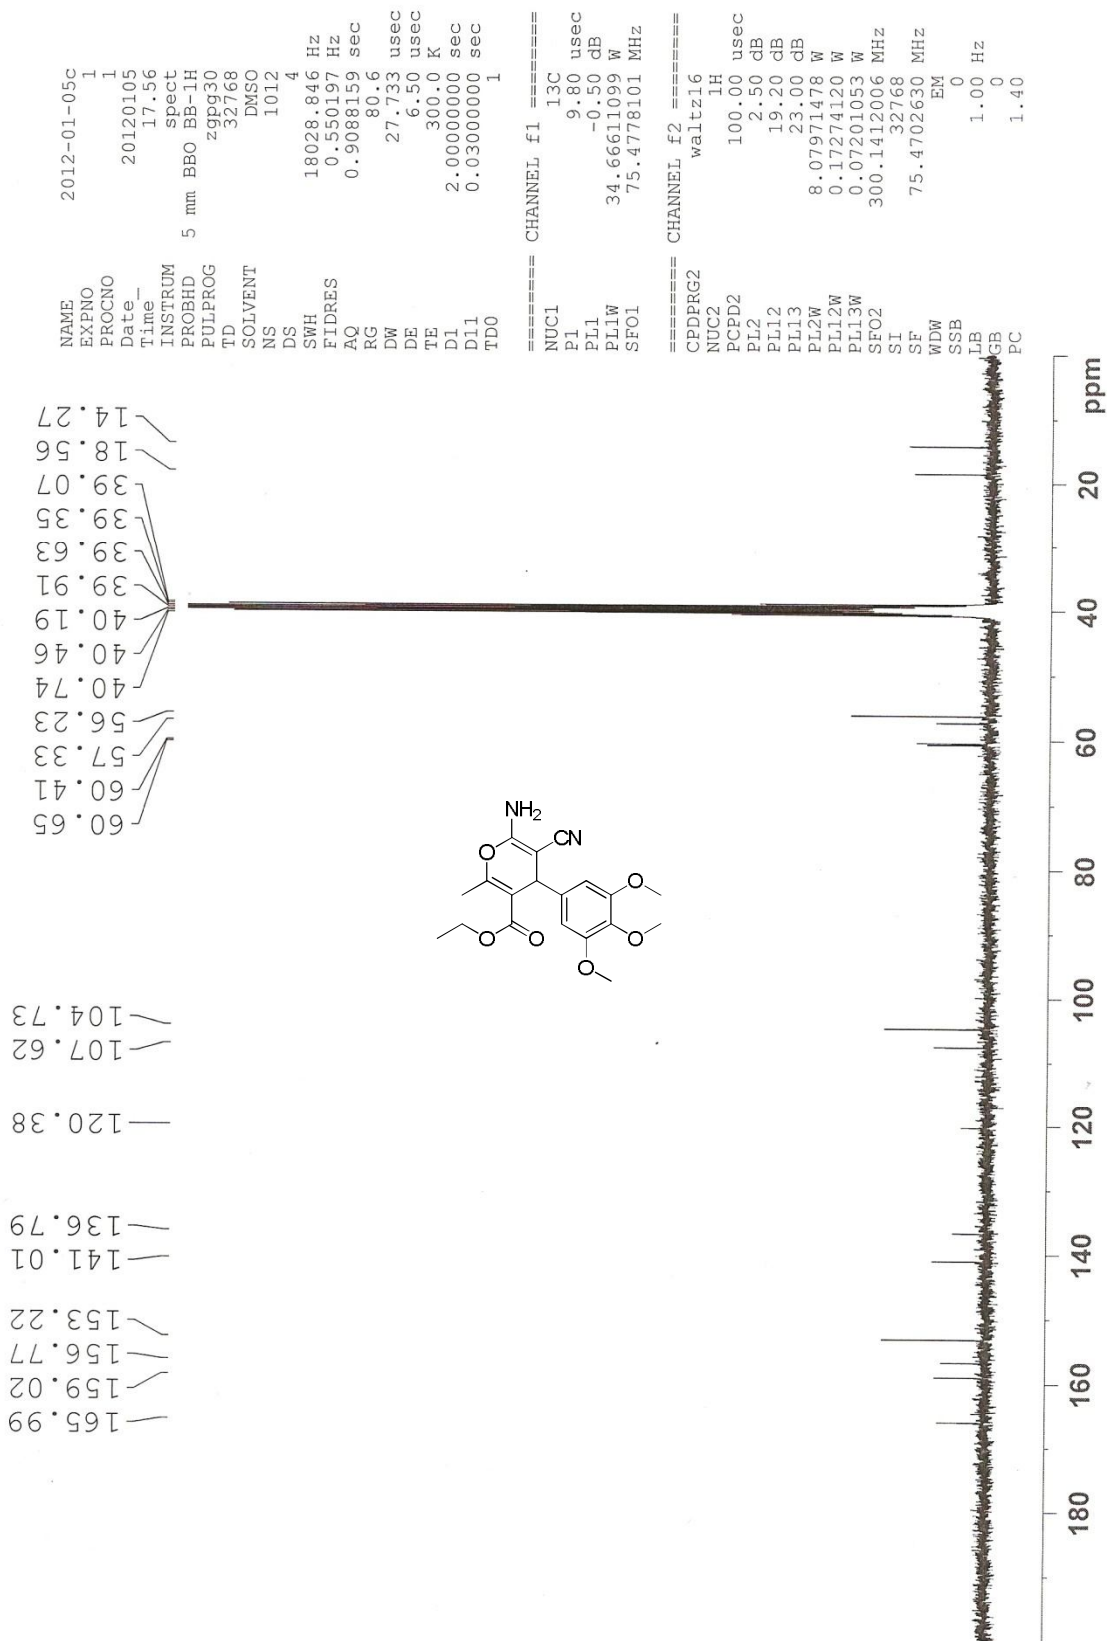

1H PGB-4, DMSOd6, 08/12/11, SAIF, NEHU, DRW

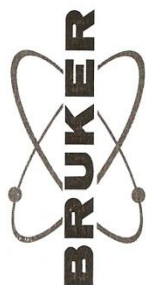

Current Data Parameters  
NAME PGB-4  
EXPNO 1  
PROCNO 1

F2 - Acquisition Parameters  
Date\_ 20111208  
Time\_ 15.11  
INSTRUM spect  
PROBHD 5 mm BBO BB-1H  
PULPROG zg  
TD 32768  
SOLVENT DMSO  
NS 8  
DS 0  
SWH 12019.230 Hz  
FIDRES 0.366798 Hz  
AQ 1.3631988 sec  
RG 57  
DW 41.600 usec  
DE 6.00 usec  
TE 300.0 K  
D1 1.0000000 sec  
TD0 1

===== CHANNEL f1 =====  
NUC1 1H  
P1 14.00 usec  
PL1 -1.00 dB  
SFO1 400.1316005 MHz

F2 - Processing parameters  
SI 16384  
SF 400.1300000 MHz  
WDW EM  
SSB 0  
LB 1.00 Hz  
GB 0  
PC 1.00

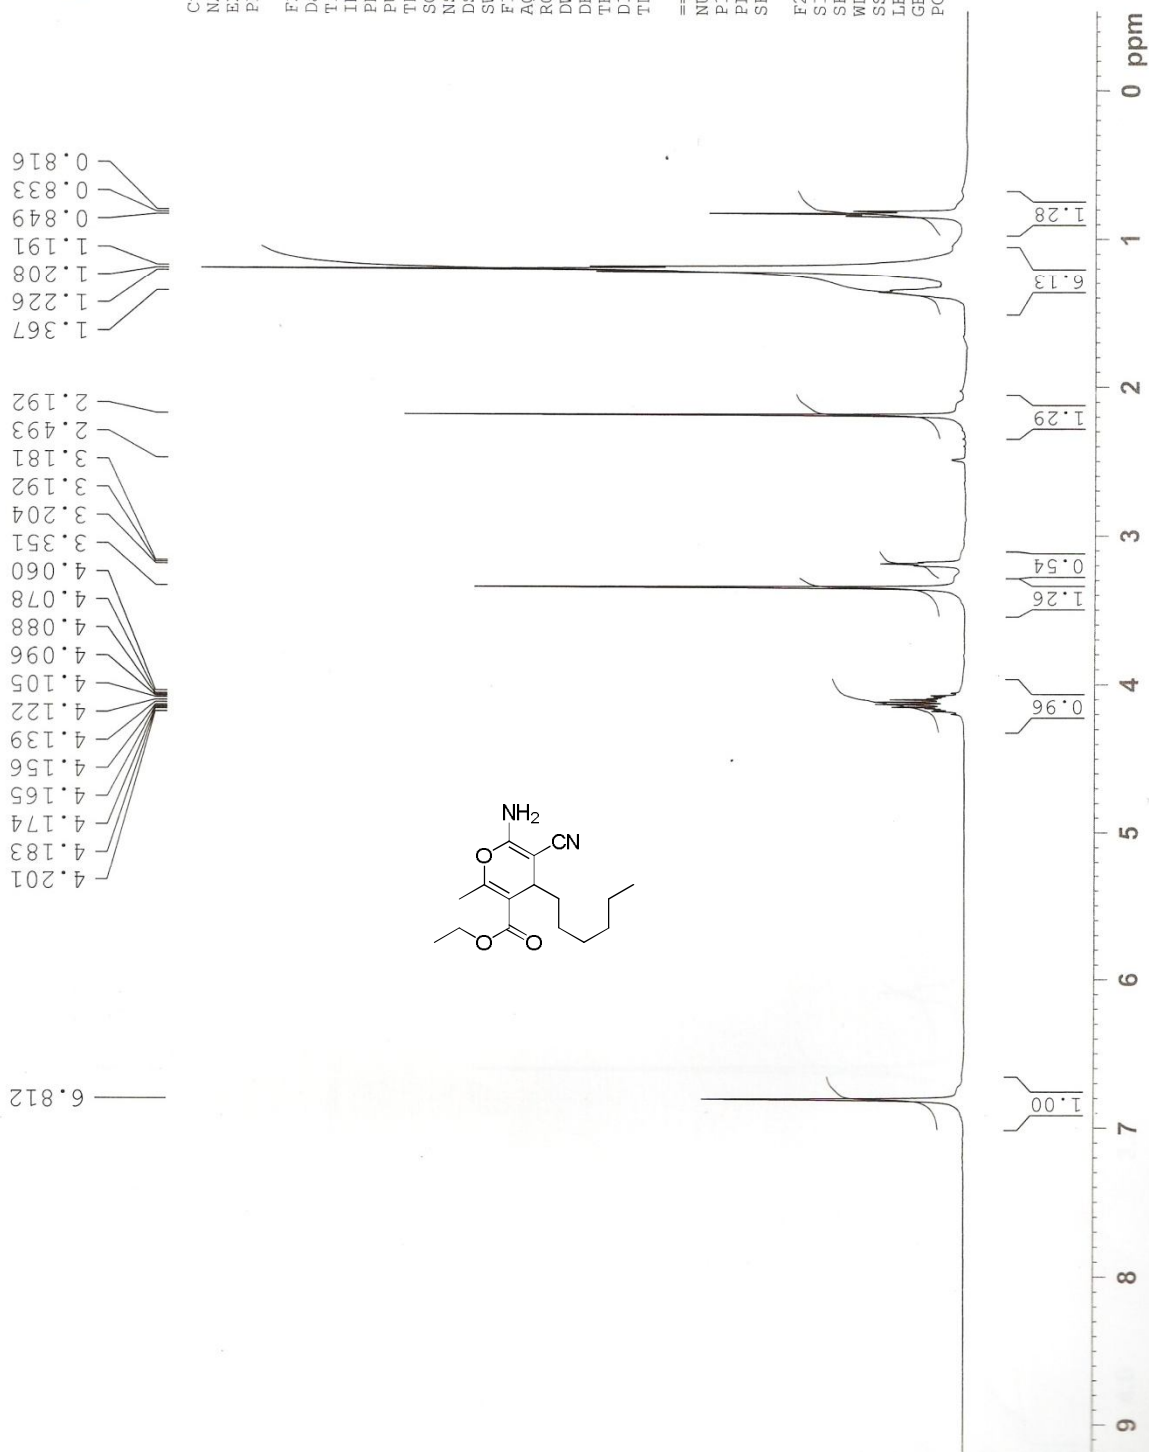

PGB-4

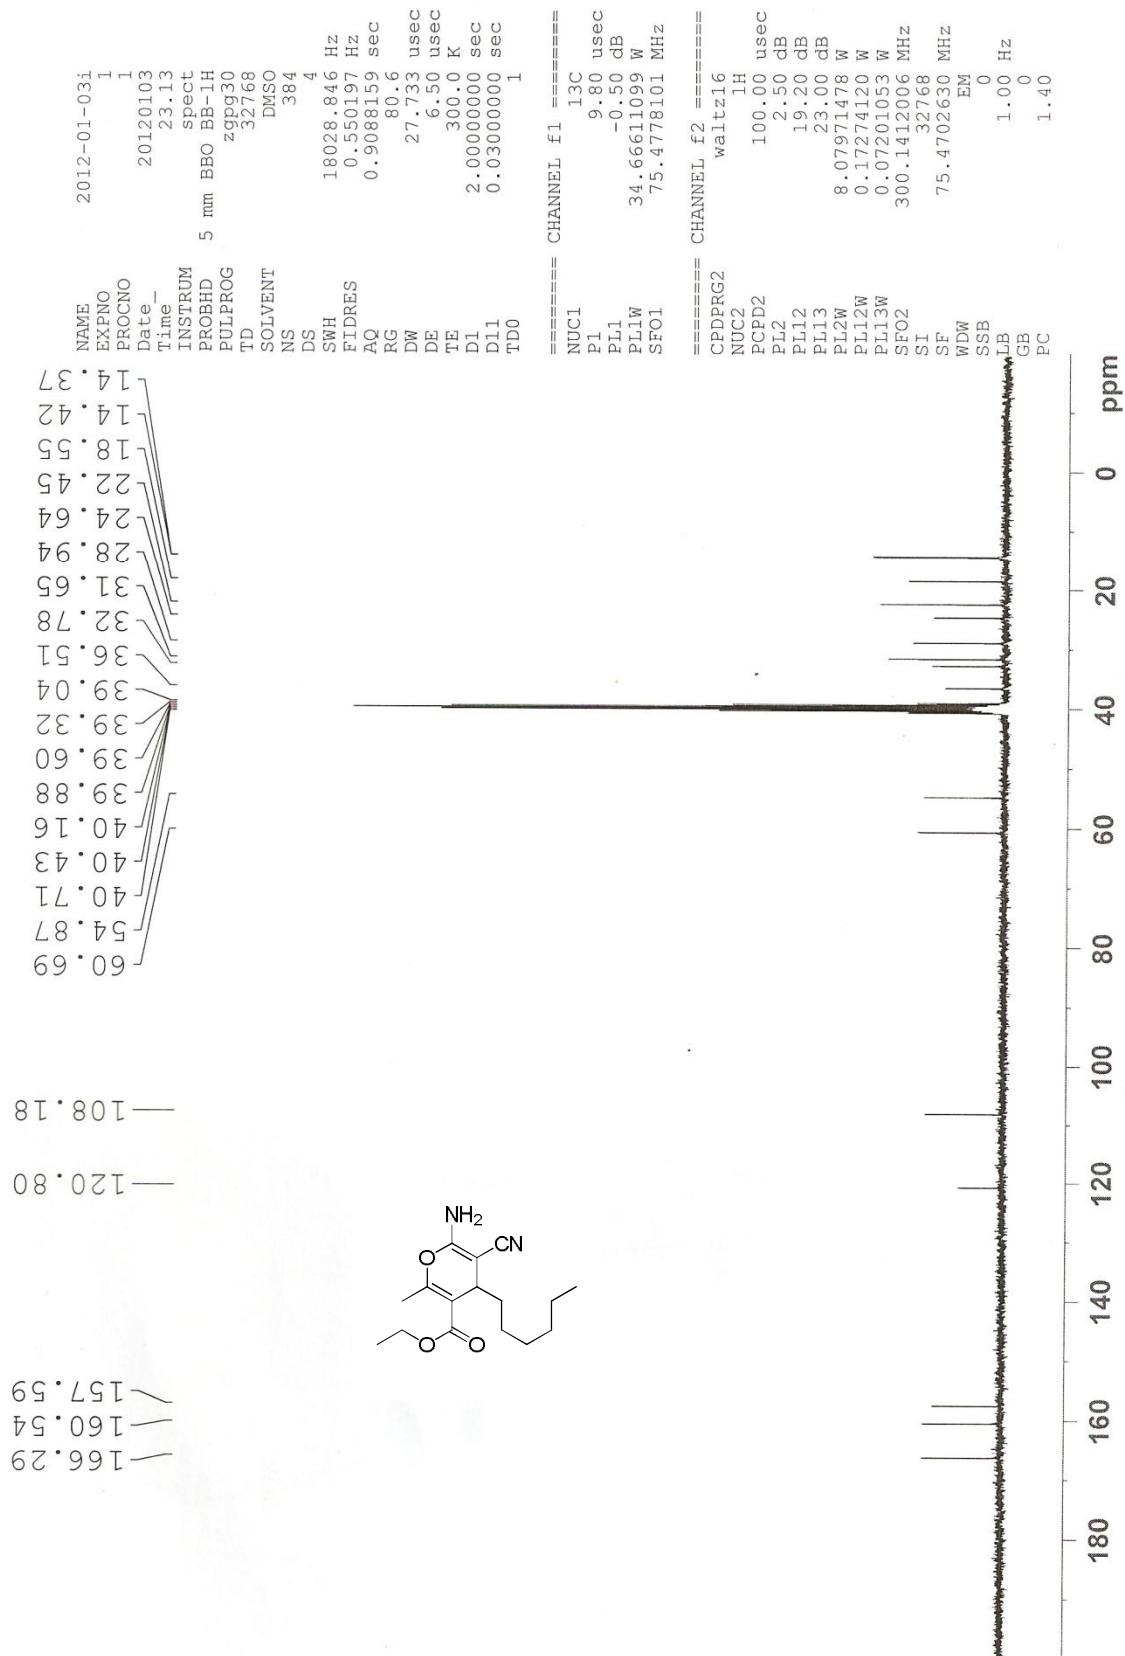

Supplement: f1 [file 785930.f1.pdf]
